# Supplementary material
Source: Springer Nature journal article supplement (https://www.springermedizin.de/resource/supplementary/12990_2009_228_MOESM5_ESM.pdf/9612838)

**Ab-fibre**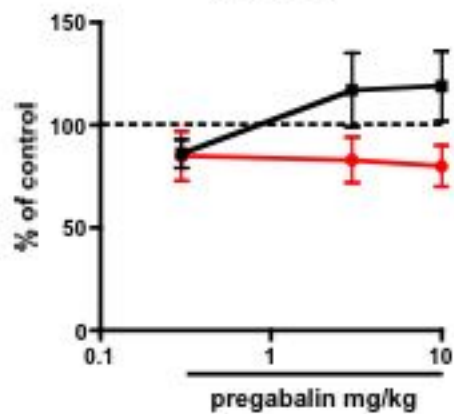**Ad-fibre**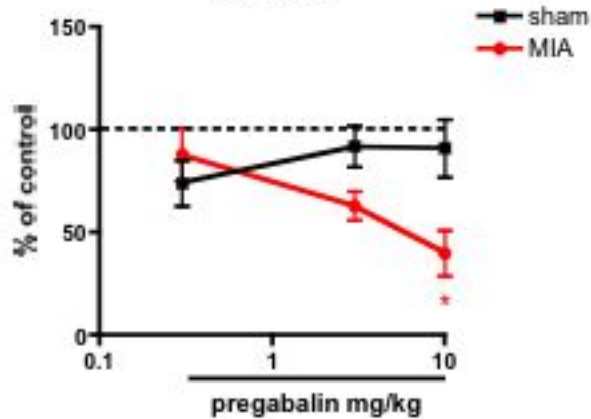**C-fibre**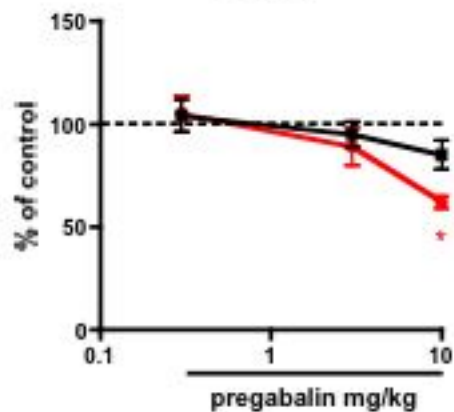**Post discharge**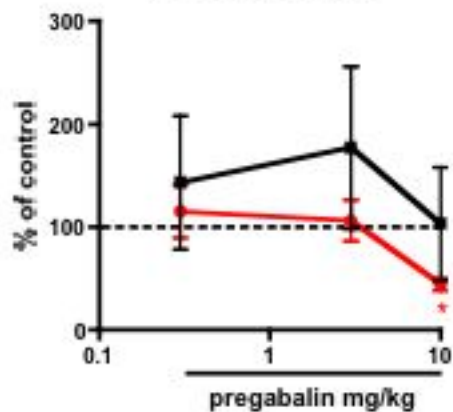

Supplement: MOESM5 [file 9612838]
